# Supplementary material
Source: PubMed Central journal article supplement (PMC8622352)
Supplement: NIHMS1737494-supplement-Supplementary_Material_A.pdf [file NIHMS1737494-supplement-Supplementary_Material_A.pdf]

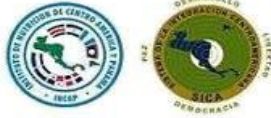

ID \_\_\_\_\_  
DATE: \_\_\_\_/\_\_\_\_/\_\_\_\_  
DATE OF BIRTH:  
\_\_\_\_/\_\_\_\_/\_\_\_\_

**FORM# 1: Nutrition Questionnaire for Adolescent Girls ages 12 to 17 years old.**

**INSTRUCTIONS:**

1. Read along with the interviewer.
2. Please mark each square with an "X" like this:
3. If you do not understand a question, please raise your hand and someone will help you.
4. We will not share your answers with your parents, teachers or any other person. **Your answers are completely confidential.**

**PERSONAL INFORMATION:**

1. Participant's Initials: \_\_\_\_\_
2. How old are you? \_\_\_\_\_
3. Name of your community: \_\_\_\_\_

**INFORMATION OF THE HOUSEHOLD:**

4. How many adults (18 years or older) live in your household? Include relatives or family friends.  
\_\_\_\_\_
5. How many people (18 years or younger) live in your household? Include relatives or family friends.  
**Do not include yourself.**  
\_\_\_\_\_

**INFORMATION ABOUT SCHOOL/ EMPLOYMENT**

6. Do you attend school?  
 Yes 6.1  No 6.2 → **Skip to question #9**

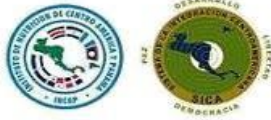

ID \_\_\_\_\_  
 DATE: \_\_\_\_/\_\_\_\_/\_\_\_\_  
 DATE OF BIRTH: \_\_\_\_/\_\_\_\_/\_\_\_\_

7. Which school do you attend?

- Public School 7.1;  Private School 7.2;

Name of the school (public or private): \_\_\_\_\_ (6.3)

8. What grade are you in? **CIRCLE ONLY ONE.**

|                 |   |   |   |   |   |   |   |       |
|-----------------|---|---|---|---|---|---|---|-------|
| Elementary 8.1  | → | 1 | 2 | 3 | 4 | 5 | 6 | (8.2) |
| Middle 8.3      | → | 1 | 2 | 3 |   |   |   | (8.4) |
| High School 8.5 | → | 4 | 5 | 6 |   |   |   | (8.6) |

9. Do you help with family work like agriculture, ranching, or business?

- Yes 9.1

↓  
 ¿How many hours do you work a week? (9.2)

| Monday | Tuesday | Wednesday | Thursday | Friday | Saturday | Sunday |
|--------|---------|-----------|----------|--------|----------|--------|
|        |         |           |          |        |          |        |

- No 9.3

10. Do you currently have a job outside of home for which you receive money?

- Yes 10.1

↓  
 ¿How many hours do you work a week? (10.2)

| Monday | Tuesday | Wednesday | Thursday | Friday | Saturday | Sunday |
|--------|---------|-----------|----------|--------|----------|--------|
|        |         |           |          |        |          |        |

- No 10.3

11. What type of responsibilities do you have at home? **CHECK ALL THAT APPLY.**

- Making Masa 11.1  
 Cleaning 11.2  
 Cooking 11.3  
 Taking care of kids at home 11.4  
 Washing clothing 11.5  
 None 11.6  
 Other: \_\_\_\_\_ 11.7



ID \_\_\_\_\_  
 DATE: \_\_\_\_/\_\_\_\_/\_\_\_\_  
 DATE OF BIRTH: \_\_\_\_/\_\_\_\_/\_\_\_\_

12. Who cooks the majority of the meals for your family? **CHECK ONLY ONE.**

- |                                 |      |                                              |      |
|---------------------------------|------|----------------------------------------------|------|
| <input type="checkbox"/> Mom    | 12.1 | <input type="checkbox"/> Sister/Brother      | 12.4 |
| <input type="checkbox"/> Dad    | 12.2 | <input type="checkbox"/> Grandma/Grandpa     | 12.5 |
| <input type="checkbox"/> Myself | 12.3 | <input type="checkbox"/> Other person: _____ | 12.6 |

13. Does your mom have a job outside of home for which she receives a salary?

- Yes 13.1 → specify: \_\_\_\_\_ (13.2)
- No 13.3
- I do not have a mother 13.4

14. Does your dad have a job outside of home for which he receives a salary?

- Yes 14.1 → specify: \_\_\_\_\_ (14.2)
- No 14.3
- I do not have a father 14.4

15. How would you describe your mom? **CIRCLE THE NUMBER THAT CORRESPONDS WITH THE FIGURE.**

- I do not have a mother 15.1

**Women**

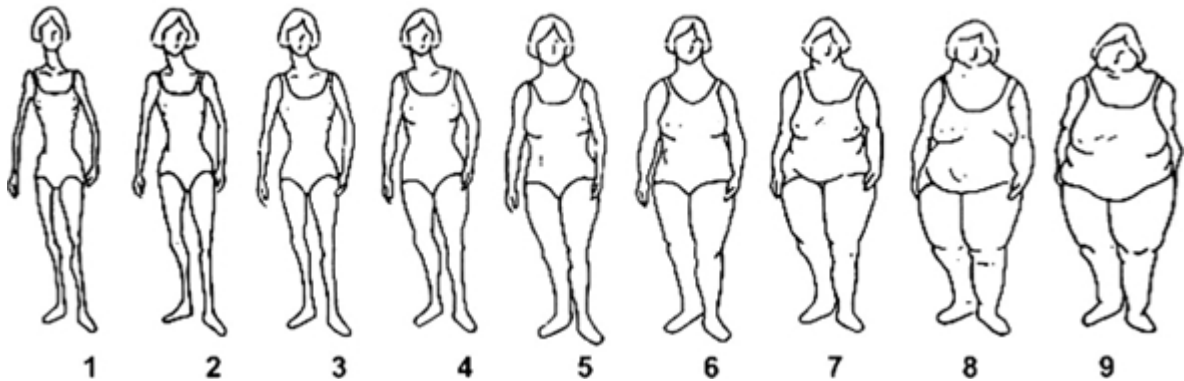

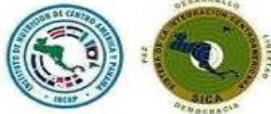

|                |             |
|----------------|-------------|
| ID             | _____       |
| DATE:          | ___/___/___ |
| DATE OF BIRTH: | ___/___/___ |

16. How would you describe your dad? **CIRCLE THE NUMBER THAT CORRESPONDS WITH THE FIGURE.**

I do not have a father 16.1

**Men**

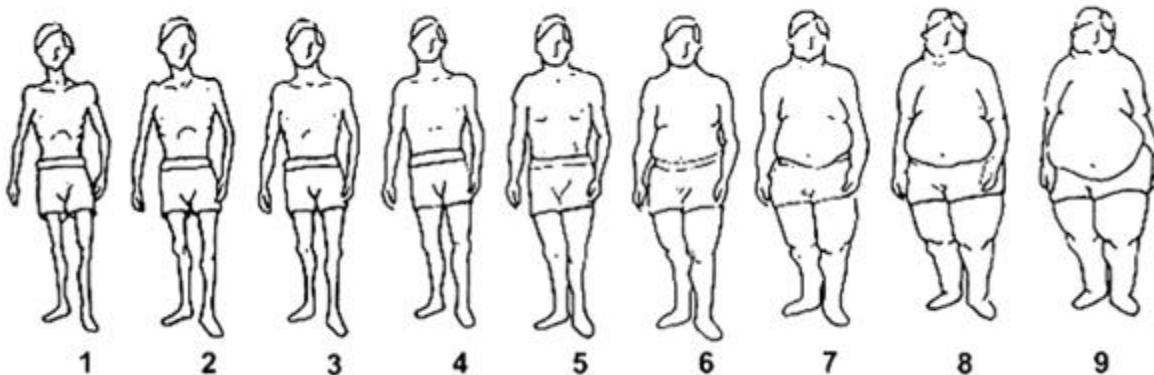

17. Do any of your family members have diabetes? **CHECK ALL THAT APPLY.**

- |                                              |                                                    |
|----------------------------------------------|----------------------------------------------------|
| <input type="checkbox"/> Dad 17.1            | <input type="checkbox"/> Grandma/Grandpa 17.5      |
| <input type="checkbox"/> Mom 17.2            | <input type="checkbox"/> Other: Specify _____ 17.6 |
| <input type="checkbox"/> Myself 17.3         | <input type="checkbox"/> I don't know 17.7         |
| <input type="checkbox"/> Sister/Brother 17.4 | <input type="checkbox"/> None 17.8                 |

18. Do any of your family members have high blood pressure? **CHECK ALL THAT APPLY**

- |                                              |                                                     |
|----------------------------------------------|-----------------------------------------------------|
| <input type="checkbox"/> Father 18.1         | <input type="checkbox"/> Grandma/Grandpa 18.5       |
| <input type="checkbox"/> Mother 18.2         | <input type="checkbox"/> Other: Specify: _____ 18.6 |
| <input type="checkbox"/> Myself 18.3         | <input type="checkbox"/> I don't know 18.7          |
| <input type="checkbox"/> Sister/Brother 18.4 | <input type="checkbox"/> None 18.8                  |

**INFORMATION ABOUT ADOLESCENT DIET**

19. During the past 30 days, often did you eat breakfast?

- |                                                         |      |
|---------------------------------------------------------|------|
| <input type="checkbox"/> Never or rarely                | 19.1 |
| <input type="checkbox"/> Less than once a week          | 19.2 |
| <input type="checkbox"/> Approximately 1-2 times a week | 19.3 |
| <input type="checkbox"/> Approximately 3-4 times a week | 19.4 |
| <input type="checkbox"/> Close to 5-6 times a week      | 19.5 |
| <input type="checkbox"/> Everyday                       | 19.6 |

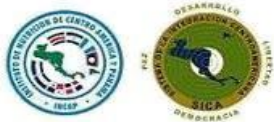

ID \_\_\_\_\_  
 DATE: \_\_\_\_/\_\_\_\_/\_\_\_\_  
 DATE OF BIRTH:  
 \_\_\_\_/\_\_\_\_/\_\_\_\_

**20. During the past 30 days,**

how often did you go hungry because there wasn't enough food in your home?

- Never or rarely 20.1
- Less than once a week 20.2
- Approximately 1-2 times a week 20.3
- Approximately 3-4 times a week 20.4
- Close to 5-6 times a week 20.5
- Every day 20.6

**21. How many servings of vegetables do you usually eat every day? One serving = 1/2 of a cup cooked vegetables or 1 cup of vegetable salad such as: carrots, lettuce, green leaf vegetables, tomato, cucumbers etc.**

- I do not eat vegetables 21.1
- Less than one serving 21.2
- 1 serving 21.3
- 2 servings 21.4
- 3 servings 21.5
- 4 servings 21.6
- 5 or more servings 21.7

**22. How many servings of fruits do you usually eat every day? One serving = 1 medium sized fruit or two small pieces of fruit or 1 cup of diced fruit**

- I do not eat fruits 22.1
- Less than one serving 22.2
- 1 serving 22.3
- 2 servings 22.4
- 3 servings 22.5
- 4 servings 22.6
- 5 or more servings 22.7

**23. Please indicate how often you usually eat the following foods.**

**CHECK WITH AN "X" THE ANSWER THAT CORRESPONDS. ONLY CHECK ONE QUESTION.**

|  | (a) Never or rarely | (b) 1-2 times per week | (c) 3-4 times per week | (d) 5-6 times per week | (e) 1 time a day | (f) 2 times a day |
|--|---------------------|------------------------|------------------------|------------------------|------------------|-------------------|
|  |                     |                        |                        |                        |                  |                   |

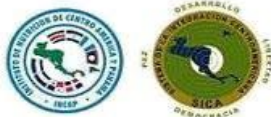

ID \_\_\_\_\_  
 DATE: \_\_\_\_/\_\_\_\_/\_\_\_\_  
 DATE OF BIRTH:  
 \_\_\_\_/\_\_\_\_/\_\_\_\_

|                                                                                                                                               |                     |                        |                        |                        |                  |                   |
|-----------------------------------------------------------------------------------------------------------------------------------------------|---------------------|------------------------|------------------------|------------------------|------------------|-------------------|
| <p><b>23.1 Meat products</b>, tales como salchichas, chorizos, jamón, hamburguesas, hotdogs o piezas de pollo fritas, nuggets, camperitos</p> | _____               | _____                  | _____                  | _____                  | _____            | _____             |
|                                                                                                                                               | (a) Never or rarely | (b) 1-2 times per week | (c) 3-4 times per week | (d) 5-6 times per week | (e) 1 time a day | (f) 2 times a day |
| <p><b>23.2 Red Meat</b>, tales como carnes de res. Incluye bistec, asados, cocido. No incluye cerdo ni pollo.</p>                             | _____               | _____                  | _____                  | _____                  | _____            | _____             |
|                                                                                                                                               | (a) Never or rarely | (b) 1-2 times per week | (c) 3-4 times per week | (d) 5-6 times per week | (e) 1 time a day | (f) 2 times a day |
| <p><b>23.3 French Fries</b> incluyendo compradas en carretas, campero, pinulito, Taco Bell, champincitos o preparadas en casa</p>             | _____               | _____                  | _____                  | _____                  | _____            | _____             |
|                                                                                                                                               | (a) Never or rarely | (b) 1-2 times per week | (c) 3-4 times per week | (d) 5-6 times per week | (e) 1 time a day | (f) 2 times a day |

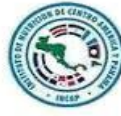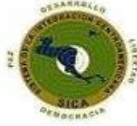

ID \_\_\_\_\_  
DATE: \_\_\_\_/\_\_\_\_/\_\_\_\_  
DATE OF BIRTH:  
\_\_\_\_/\_\_\_\_/\_\_\_\_

|                                                                                                                                                                                                 |                     |                        |                        |                        |                  |                   |
|-------------------------------------------------------------------------------------------------------------------------------------------------------------------------------------------------|---------------------|------------------------|------------------------|------------------------|------------------|-------------------|
| <p><b>23.4 Chips or other salty snacks</b> tipo de alimento <i>salado</i> en bolsita como tortrix, cheeto, chips, yuquitas, tostadas, pastelitos de papa, plataninas, chicharrines, poffets</p> | _____               | _____                  | _____                  | _____                  | _____            | _____             |
|                                                                                                                                                                                                 | (a) Never or rarely | (b) 1-2 times per week | (c) 3-4 times per week | (d) 5-6 times per week | (e) 1 time a day | (f) 2 times a day |
| <p><b>23.5 Pastries</b>, tales como galletas, pan dulce, pasteles, donas, panqueques</p>                                                                                                        | _____               | _____                  | _____                  | _____                  | _____            | _____             |
|                                                                                                                                                                                                 | (a) Never or rarely | (b) 1-2 times per week | (c) 3-4 times per week | (d) 5-6 times per week | (e) 1 time a day | (f) 2 times a day |
| <p><b>23.6 Candy</b> tales como dulces, paletas, cervecitas, chocolates, bombones, nucas</p>                                                                                                    | _____               | _____                  | _____                  | _____                  | _____            | _____             |
|                                                                                                                                                                                                 | (a) Never or rarely | (b) 1-2 times per week | (c) 3-4 times per week | (d) 5-6 times per week | (e) 1 time a day | (f) 2 times a day |
| <p><b>23.7 Ice Cream</b> de crema o de hielo</p>                                                                                                                                                | _____               | _____                  | _____                  | _____                  | _____            | _____             |

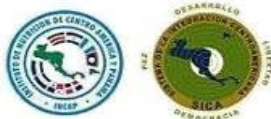

ID \_\_\_\_\_  
 DATE: \_\_\_\_/\_\_\_\_/\_\_\_\_  
 DATE OF BIRTH:  
 \_\_\_\_/\_\_\_\_/\_\_\_\_

**24. How often do you eat takeout meals like hamburgers or pizzas that you buy outside of home?**

- Never or rarely 24.1
- Less than once a week 24.2
- Approximately 1-2 times a week 24.3
- Approximately 3-4 times a week 24.4
- Close to 5-6 times a week 24.5
- Everyday 24.6

**25. How often do you eat dinner in front of the TV?**

- Never or rarely 25.1
- Less than once a week 25.2
- Approximately 1-2 times a week 25.3
- Approximately 3-4 times a week 25.4
- Close to 5-6 times a week 25.5
- Everyday 25.6

**26. Please indicate how many cups of the following drinks you usually consume.**

**CHECK WITH AN “X” THE ANSWER THAT CORRESPONDS. ONLY MARK ONE ANSWER FOR EACH QUESTION.**

|                                                                 | (a) 1 cup or less per week | (b) 2-4 cups per week | (c) 5-6 cups per week | (d) 1 cup per day | (e) 2 or more cups per day |
|-----------------------------------------------------------------|----------------------------|-----------------------|-----------------------|-------------------|----------------------------|
| <b>26.1 Fruit Juice</b><br>(una taza casera = un vaso de 250ml) | _____                      | _____                 | _____                 | _____             | _____                      |
|                                                                 | (a) 1 cup or less per week | (b) 2-4 cups per week | (c) 5-6 cups per week | (d) 1 cup per day | (e) 2 or more cups per day |



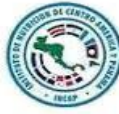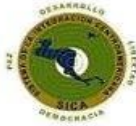

ID \_\_\_\_\_  
 DATE: \_\_\_\_/\_\_\_\_/\_\_\_\_  
 DATE OF BIRTH:  
 \_\_\_\_/\_\_\_\_/\_\_\_\_

|                                                                                                                                                            |                            |                       |                       |                   |                            |
|------------------------------------------------------------------------------------------------------------------------------------------------------------|----------------------------|-----------------------|-----------------------|-------------------|----------------------------|
| <p><b>26.2 Water (Tap or bottled)</b></p> <p>(una taza casera = un vaso de 250ml., una botella de tamaño promedio = 2 ½ tazas)</p>                         | _____                      | _____                 | _____                 | _____             | _____                      |
|                                                                                                                                                            | (a) 1 cup or less per week | (b) 2-4 cups per week | (c) 5-6 cups per week | (d) 1 cup per day | (e) 2 or more cups per day |
| <p><b>26.3 Soft Drinks, Soda, Sports Drinks</b> Pepsi, CocaCola, Gatorade, Bicola, riquitas, fruta fresca</p> <p>(1 vaso=250 ml; una lata = 1 ½ vasos)</p> | _____                      | _____                 | _____                 | _____             | _____                      |
|                                                                                                                                                            | (a) 1 cup or less per week | (b) 2-4 cups per week | (c) 5-6 cups per week | (d) 1 cup per day | (e) 2 or more cups per day |
| <p><b>26.4 Diet soft drinks, Diet soda</b> Cocacola dieta, Coke Zero (1 vaso=250 ml; una lata = 1 ½ vasos)</p>                                             | _____                      | _____                 | _____                 | _____             | _____                      |

27. How many times a week do you have energy drinks like: Raptor, Red Bull, AMP, Adrenalina or Monster?

- Never or rarely 27.1
- Less than once a week 27.2
- Approximately 1-2 times a week 27.3
- Approximately 3-4 times a week 27.4
- Close to 5-6 times a week 27.5
- Everyday 27.6



ID \_\_\_\_\_  
 DATE: \_\_\_\_/\_\_\_\_/\_\_\_\_  
 DATE OF BIRTH:  
 \_\_\_\_/\_\_\_\_/\_\_\_\_

**28. How often do you....**

**CHECK WITH AN “X” THE ANSWER THAT APPLY.**

|                                                | (a) Usually | (b) Sometimes | (c) Never or rarely |
|------------------------------------------------|-------------|---------------|---------------------|
| 28.1 Have soft drinks instead of water or milk |             |               |                     |
| 28.2 Have soft drinks available in your home   |             |               |                     |
| 28.3 Drink soft drinks with my meals at home   |             |               |                     |

29. What type of cooking oil or grease is used to cook meals at home?

- Vegetable oil 29.1       Pork Lard 29.3       I don't know 29.5  
 Margarine 29.2       Vegetable Butter 29.4

30. With how many teaspoons of sugar do you add to sweeten a drink or a cup of coffee?

- 1-2 teaspoons 30.1  
 3-4 teaspoons 30.2  
 5 or more teaspoons 30.3  
 I do not add sugar 30.4

31. Do you usually add salt to the food served at the table?

- Never or rarely 31.1  
 Sometimes 31.2  
 Frequently 31.3  
 Always 31.4  
 I do not add salt 31.5

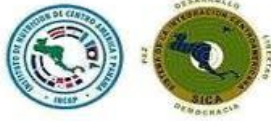

ID \_\_\_\_\_  
DATE: \_\_\_\_ / \_\_\_\_ / \_\_\_\_  
DATE OF BIRTH:  
\_\_\_\_ / \_\_\_\_ / \_\_\_\_

### PHYSICAL ACTIVITY

**32. During the last seven days, how many days were you physically active at least 60 minutes (1 hour) a day? ADD ALL THE TIME YOU SPEND DOING ANY TYPE OF PHYSICAL ACTIVITY IN ONE DAY.**

- 0 days            32.1
- 1 day             32.2
- 2 days            32.3
- 3 days            32.4
- 4 days            32.5
- 5 days            32.6
- 6 days            32.7
- 7 days            32.8

**33. During breaks at school, do you play games that require moderate or vigorous physical effort? A moderate or vigorous physical effort means activities that cause sweating, increased heart rate or breathing such as running, playing football, playing basketball or playing volleyball.**

- Yes                                  33.1
- No                                    33.2
- I cannot perform the activity    33.3
- It is not permitted to play during school breaks    33.4

**34. When you are not in school and during the weekends, do you usually participate in games that require physical activity or physical effort?**

- Yes            34.1
- No            34.2

**35. Do you think you should be more active or engage in more exercise?**

- Yes            35.1
- No            35.2

**36. How much time do you spend during a typical or normal day watching TV?**

How many hours? \_\_\_\_\_ hours a day

**37. How much time do you spend during a typical or normal day playing video games, using the Internet or social media (WhatsApp, Facebook, etc.) through a cell phone or a computer?**

How many hours? \_\_\_\_\_ hours a day

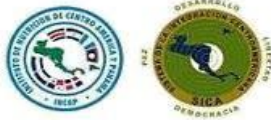

ID \_\_\_\_\_  
DATE: \_\_\_\_/\_\_\_\_/\_\_\_\_  
DATE OF BIRTH:  
\_\_\_\_/\_\_\_\_/\_\_\_\_

**PERSONAL HEALTH**

38. With respect to your health, do you consider yourself a healthy person?

- Yes 38.1                                       No 38.2                                       I don't know 38.3

39. Do you know or have you been told that you have a health problem or receive treatment with medicines?

- Yes; 39.1 → Specify: a) \_\_\_\_\_ 39.2  
b) \_\_\_\_\_ 39.3  
 No 39.4  
 I don't know 39.5

40. In past 3 months, have you visited a doctor or a clinic?

- Yes 40.1  
 No 40.2 →Skip to question #42  
 I don't know 40.3

41. Why did you visit the doctor or health post?

- Sickness 41.1  
 General check-up 41.2

42. How would you describe your weight? **CIRCLE THE NUMBER THAT CORRESPONDS WITH THE FIGURE.**

Women

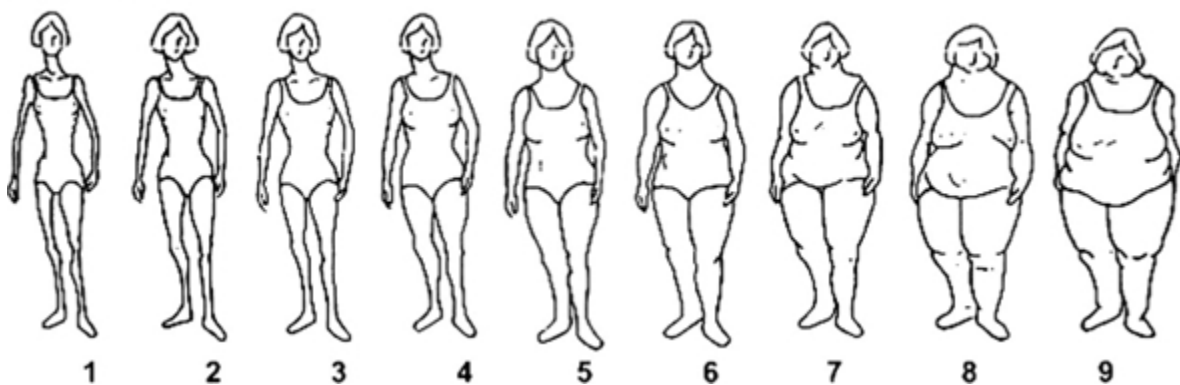

43. With respect to the last question, do you think that...

- I need to lose weight 43.1  
 I need to gain weight 43.2  
 I do not need to lose or gain weight 43.3  
 I don't know 43.4

***You have finished! Thanks for participating!***



|                                  |
|----------------------------------|
| ID _____                         |
| DATE: ____/____/____             |
| DATE OF BIRTH:<br>____/____/____ |

**End of the questionnaire:**

44. Person who directed the questionnaire: \_\_\_\_\_

45. Date: \_\_\_\_/\_\_\_\_/\_\_\_\_

46. Person who revised the questionnaire: \_\_\_\_\_

47. Date: \_\_\_\_/\_\_\_\_/\_\_\_\_

48. Person who processed the data: \_\_\_\_\_

49. Date: \_\_\_\_/\_\_\_\_/\_\_\_\_

50. Observations:

---

---

---



|                |                |
|----------------|----------------|
| ID             | _____          |
| DATE:          | ____/____/____ |
| DATE OF BIRTH: | ____/____/____ |

**FORM # 2: EVALUATION OF BIOMARKERS**

**Clinical Data / Body Measurements**

Height (cm, 0.1):

- 1. First: \_\_\_\_\_
- 2. Second: \_\_\_\_\_
- 3. Third if necessary: \_\_\_\_\_

Weight (kg, 0.1):

- 4. First \_\_\_\_\_
- 5. Second: \_\_\_\_\_
- 6. Third if necessary: \_\_\_\_\_
- 7. Body Mass Index (calculated, 0.1): \_\_\_\_\_ kg/m<sup>2</sup>

Waist Circumference (cm, 0.1):

- 8. First: \_\_\_\_\_
- 9. Second: \_\_\_\_\_
- 10. Third if necessary: \_\_\_\_\_

Hip Circumference (cm, 0.1):

- 11. First: \_\_\_\_\_
- 12. Second: \_\_\_\_\_
- 13. Third if necessary: \_\_\_\_\_

**Blood pressure (systolic / diastolic) (sitting position after 5 min rest)**

- 14. First: \_\_\_\_\_/\_\_\_\_\_ mmHg,      14.1 Pulse: \_\_\_\_\_
- 15. Second: \_\_\_\_\_/\_\_\_\_\_ mmHg      15.1 Pulse: \_\_\_\_\_
- 16. Third: \_\_\_\_\_/\_\_\_\_\_ mmHg;      16.1 Pulse: \_\_\_\_\_
- 17. If necessary: Fourth: \_\_\_\_\_/\_\_\_\_\_ mmHg      17.1 Pulse: \_\_\_\_\_

**Assessment of Acanthosis Nigricans: Areas of Evaluation:**

18. Neck

- Absent 18.1
- Yes → Present \_\_\_18.2 Mild \_\_\_18.3 Moderate\_\_\_18.4 Severe \_\_\_18.5

19. Elbow Crease

- Absent 19.1
- Yes → Present \_\_\_19.2 Mild \_\_\_19.3 Moderate\_\_\_19.4 Severe \_\_\_19.5

20. Armpit

- Absent 20.1
- Yes → Present \_\_\_20.2 Mild \_\_\_20.3 Moderate\_\_\_20.4 Severe \_\_\_20.5

21. Hand Knuckles

- Absent 21.1
- Yes → Present \_\_\_21.2 Mild \_\_\_21.3 Moderate\_\_\_21.4 Severe \_\_\_21.5

22. Observations: \_\_\_\_\_

**Instituto de Nutrición de  
Centro América y Panamá  
—INCAP—**

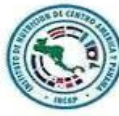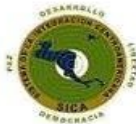

|                                  |
|----------------------------------|
| ID _____                         |
| DATE: ____/____/____             |
| DATE OF BIRTH:<br>____/____/____ |

**Completion Form:**

23. Technician: \_\_\_\_\_ Date: \_\_\_\_/\_\_\_\_/\_\_\_\_ 23.1

24. Reviewer: \_\_\_\_\_ Date: \_\_\_\_/\_\_\_\_/\_\_\_\_ 24.1

25. Person who processed the data: \_\_\_\_\_ Date: \_\_\_\_/\_\_\_\_/\_\_\_\_ 25.1
