# Supplementary material
Source: PubMed Central journal article supplement (PMC8622352)
Supplement: NIHMS1737494-supplement-Supplementary_Material_B.pdf [file NIHMS1737494-supplement-Supplementary_Material_B.pdf]

**Supplement B:** Evaluation of the revised version of sociodemographic, lifestyle, and dietary risk factors; result from principal component analysis

| <b>Items</b>                                 | <b>Factor loadings</b> |
|----------------------------------------------|------------------------|
| <b>Socio-demographics</b>                    |                        |
| Age                                          | 0.7874                 |
| Education                                    | 0.7921                 |
| Dad occupation                               | 0.7032                 |
| Family size                                  | 0.7086                 |
| <b>Sedentary behavior</b>                    |                        |
| Watching TV ( $\geq 2$ hours/day)            | 0.7299                 |
| Dinner in front of TV ( $\geq 3$ times/week) | 0.7042                 |
| Using cell/computer ( $\geq 2$ hours/day)    | 0.8628                 |
| <b>Physical health risk status</b>           |                        |
| Mother's body size                           | 0.9829                 |
| Waist circumference                          | 0.7085                 |
| Hypertension                                 | 0.7990                 |
| <b>Dietary pattern</b>                       |                        |
| Fruit consumption                            | 0.9091                 |
| Vegetables consumption                       | 0.9073                 |
| <b>Unhealthy foods</b>                       |                        |
| Red meat                                     | 0.9445                 |
| Junk food intake                             | 0.9832                 |
| <b>Family food practice</b>                  |                        |
| Eating take out/fast food                    | 0.8776                 |
| Soft drinks available at home                | 0.9458                 |
